# Supplementary material for: Blood Pressure and Chronic Kidney Disease Stratified by Gender and the Use of Antihypertensive Drugs
Source: PubMed Central journal article supplement — J Am Heart Assoc. 2020 Aug 14;9(16):e015592. doi: 10.1161/JAHA.119.015592 (PMC7660816; doi:10.1161/jaha.119.015592), 2020-08-14
Supplement: JAH3-9-e015592-s001.pdf [file JAH3-9-e015592-s001.pdf]

# **SUPPLEMENTAL MATERIAL**

**Table S1. BMI-adjusted difference in eGFR between men and women according to BP category and the use of antihypertensive treatment.**

| BP group                 | BMI-adjusted eGFR at baseline<br>(Standard Error) |              | <i>P</i> |
|--------------------------|---------------------------------------------------|--------------|----------|
|                          | Men                                               | Women        |          |
| Untreated normal BP      | 84.88 (0.06)                                      | 86.00 (0.07) | <0.0001  |
| Untreated high normal BP | 85.48 (0.09)                                      | 85.91 (0.15) | 0.015    |
| Untreated high BP        | 84.65 (0.07)                                      | 85.54 (0.14) | <0.0001  |
| Untreated grade 1 HT     | 84.80 (0.11)                                      | 85.67 (0.27) | 0.0026   |
| Untreated grade 2–3 HT   | 84.80 (0.27)                                      | 85.38 (0.53) | 0.33     |
| Treated normal BP        | 82.33 (0.33)                                      | 84.01 (0.60) | 0.016    |
| Treated high normal BP   | 83.44 (0.39)                                      | 83.51 (0.66) | 0.93     |
| Treated high BP          | 83.43 (0.20)                                      | 84.22 (0.41) | 0.088    |
| Treated grade 1 HT       | 83.68 (0.22)                                      | 84.38 (0.49) | 0.19     |
| Treated grade 2–3 HT     | 84.01 (0.42)                                      | 83.40 (0.93) | 0.55     |

The analysis of covariance with model included BMI and men as independent variables. We performed the analysis in each BP group.

**Table S2. Number of CKD events and incidence rates in each BP-antihypertensive treatment group**

| Strata          | BP group       | CKD events/<br>participants, n | Age-standardized<br>CKD incidence, per<br>1000 person-year |
|-----------------|----------------|--------------------------------|------------------------------------------------------------|
| Untreated men   | Normal BP      | 3,124 / 39,877                 | 16.98                                                      |
|                 | High Normal BP | 1,449 / 16,968                 | 18.02                                                      |
|                 | High BP        | 2,992 / 29,644                 | 20.26                                                      |
|                 | Grade 1 HT     | 1,407 / 11,008                 | 26.00                                                      |
|                 | Grade 2–3 HT   | 297 / 2,019                    | 34.96                                                      |
| Treated men     | Normal BP      | 130 / 960                      | 35.76                                                      |
|                 | High Normal BP | 108 / 845                      | 34.39                                                      |
|                 | High BP        | 497 / 3,061                    | 39.11                                                      |
|                 | Grade 1 HT     | 494 / 2,679                    | 41.34                                                      |
|                 | Grade 2–3 HT   | 148 / 731                      | 47.50                                                      |
| Untreated women | Normal BP      | 2,604 / 30,096                 | 17.63                                                      |
|                 | High Normal BP | 531 / 5,858                    | 18.68                                                      |
|                 | High BP        | 639 / 6,528                    | 20.68                                                      |
|                 | Grade 1 HT     | 184 / 1,879                    | 23.37                                                      |
|                 | Grade 2–3 HT   | 54 / 508                       | 28.30                                                      |
| Treated women   | Normal BP      | 20 / 291                       | 18.62                                                      |
|                 | High Normal BP | 22 / 296                       | 18.16                                                      |
|                 | High BP        | 85 / 742                       | 28.05                                                      |
|                 | Grade 1 HT     | 80 / 552                       | 35.85                                                      |
|                 | Grade 2–3 HT   | 23 / 150                       | 37.93                                                      |

The CKD incidence rates were calculated after age-standardization (<45/45–59/≥60 years) by the direct method. BP, blood pressure; HT, hypertension; CKD, chronic kidney disease.

Figure S1. Baseline eGFR and age-adjusted CKD incidence.

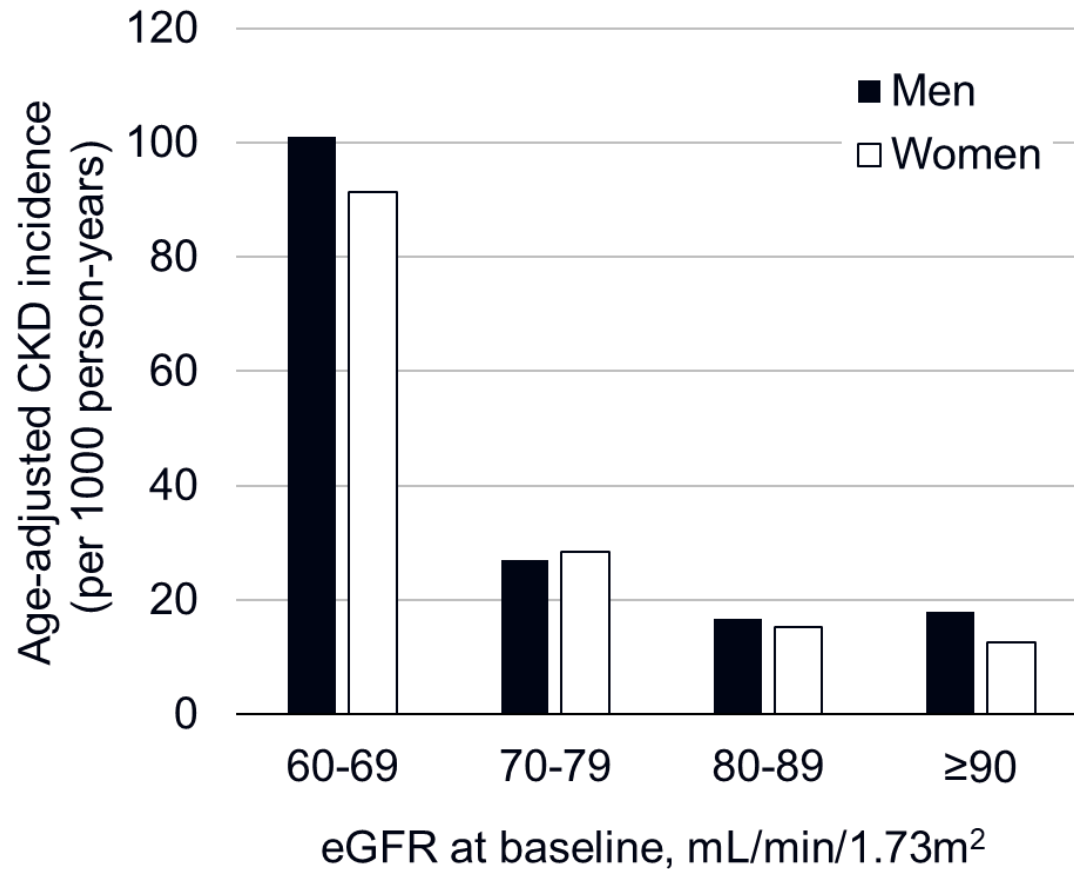

We calculated the CKD incidence rates after age-standardization (<45/45–59/≥60 years) by the direct method. The participants with eGFR<70 mL/min/1.73 m<sup>2</sup> were excluded from the main analysis.

CKD, chronic kidney disease; eGFR, estimated glomerular filtration rate.

Figure S2. BP and the risk of CKD incidence in men (BMI was included in the model as a continuous variable).

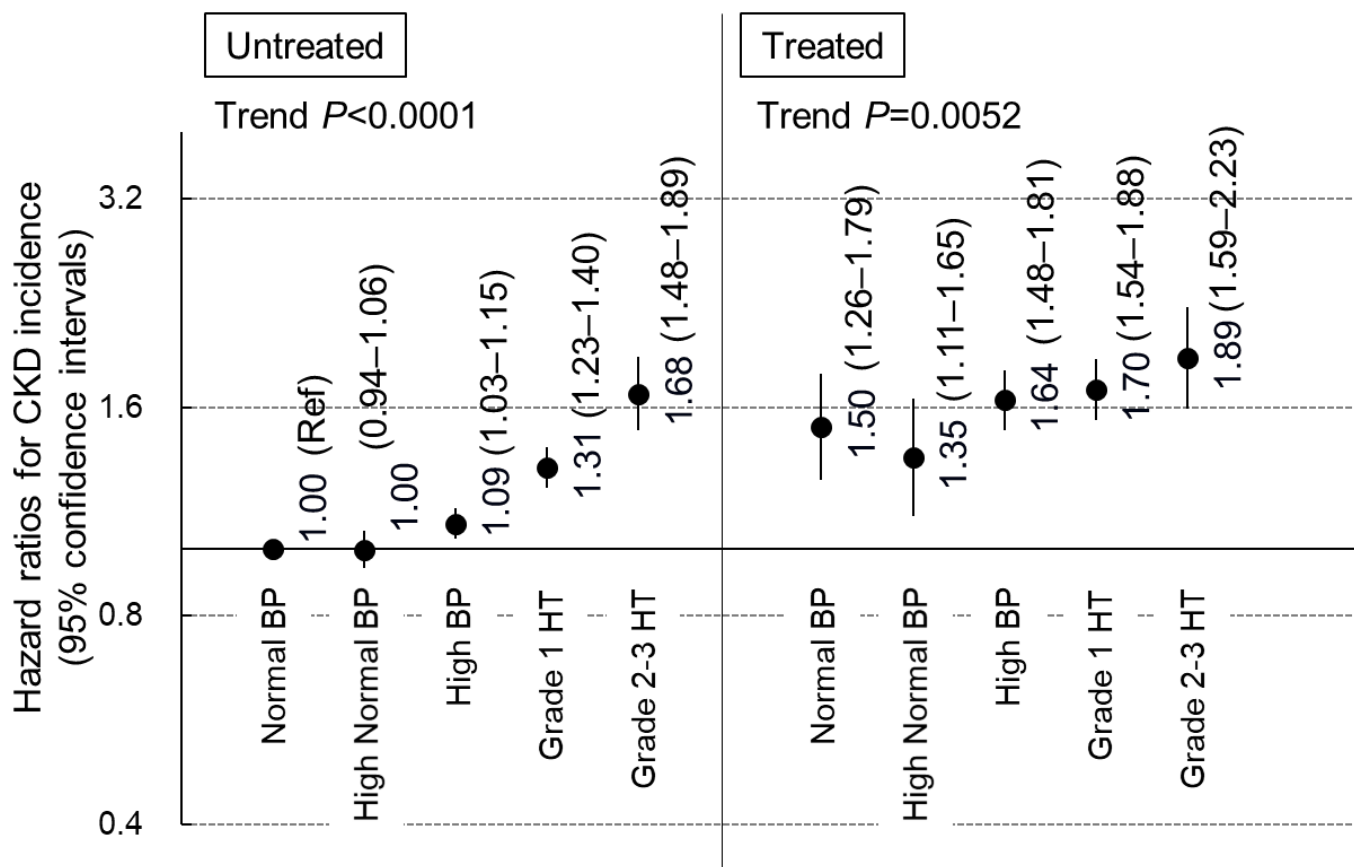

Covariates were age, linear and quadratic terms of BMI, current smoking status, alcohol consumption, diabetes mellitus, dyslipidemia, and eGFR at baseline. BMI, body mass index; BP, blood pressure; CKD, chronic kidney disease; HT, hypertension; eGFR, estimated glomerular filtration rate.

Figure S3. BP and the risk of CKD incidence in women (BMI was included in the model as a continuous variable).

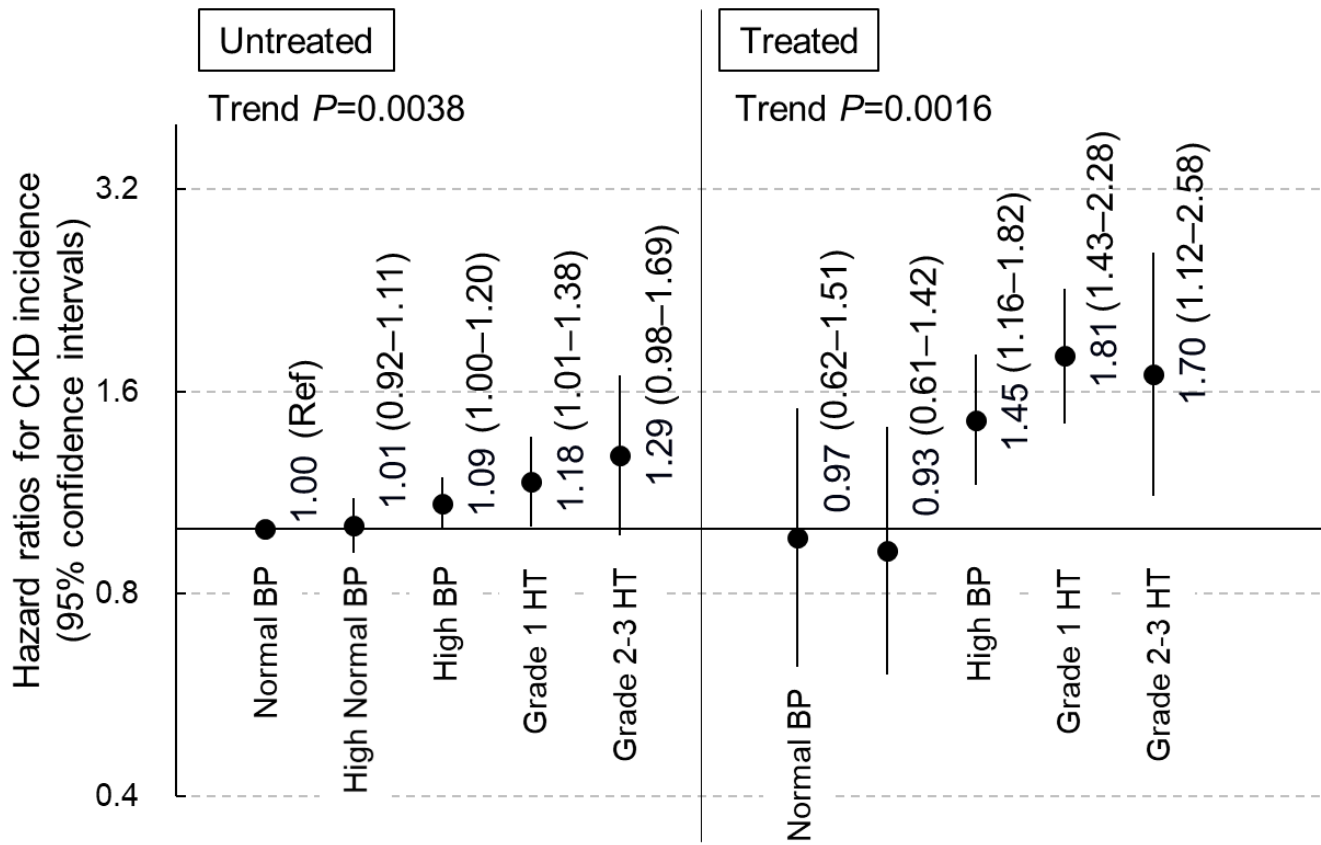

Covariates and abbreviations are the same as indicated in Figure S2.

**Figure S4. BP and the risk of CKD incidence in men after excluding high BP or hypertensive participants who were untreated at baseline but treated during follow-up.**

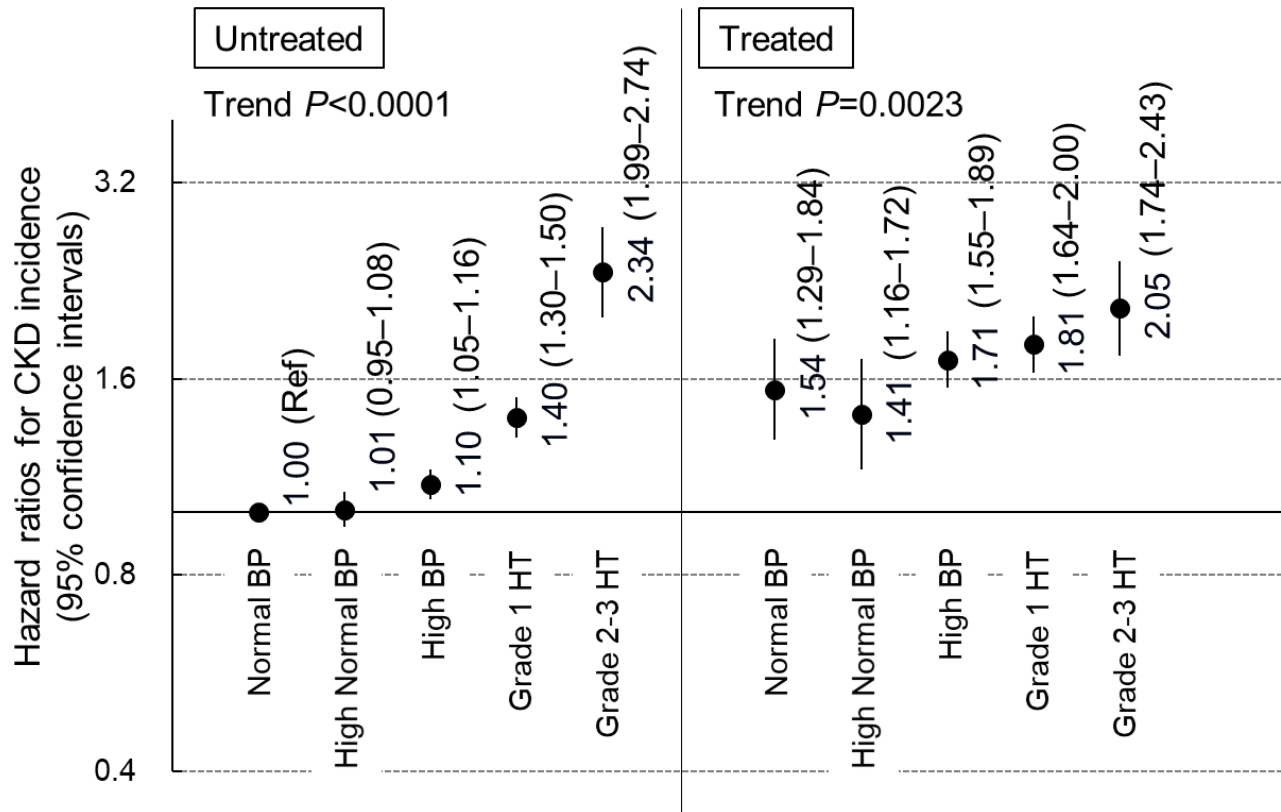

The untreated participants with high BP or hypertension at baseline and with antihypertensive treatment initiated during follow-up were excluded. Covariates were age, body mass index <18.5 kg/m<sup>2</sup>, body mass index ≥25 kg/m<sup>2</sup>, current smoking status, alcohol consumption, diabetes mellitus, dyslipidemia, and eGFR at baseline. BP, blood pressure; CKD, chronic kidney disease; HT, hypertension; eGFR, estimated glomerular filtration rate.

**Figure S5. BP and the risk of CKD incidence in women after excluding high BP or hypertensive participants who were untreated at baseline but treated during follow-up.**

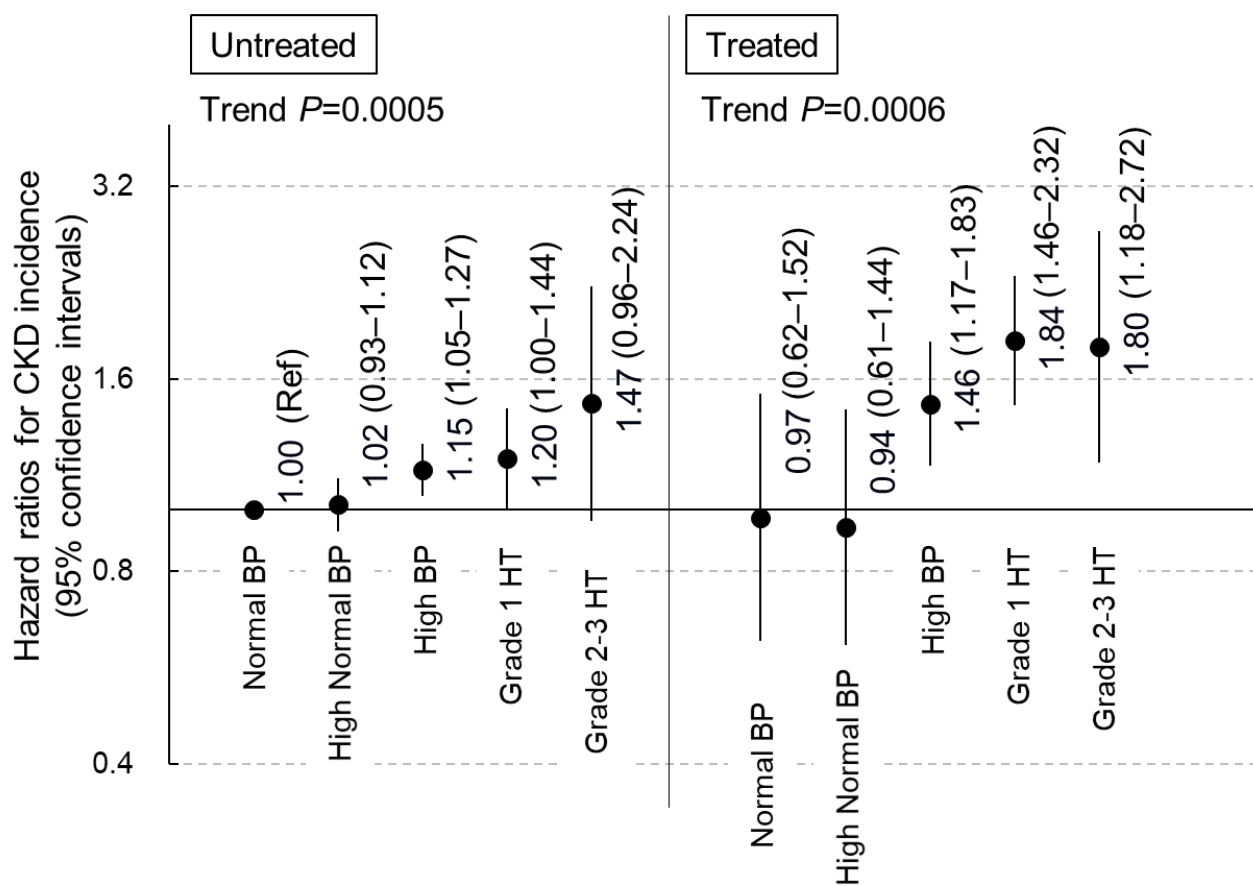

The untreated participants with high BP or hypertension at baseline and with antihypertensive treatment initiated during follow-up were excluded. Covariates and abbreviations are the same as indicated in **Figure S4**.



**Figure S6. Restricted spline curves of hazard ratio stratified by sex and the use of antihypertensive treatment.**

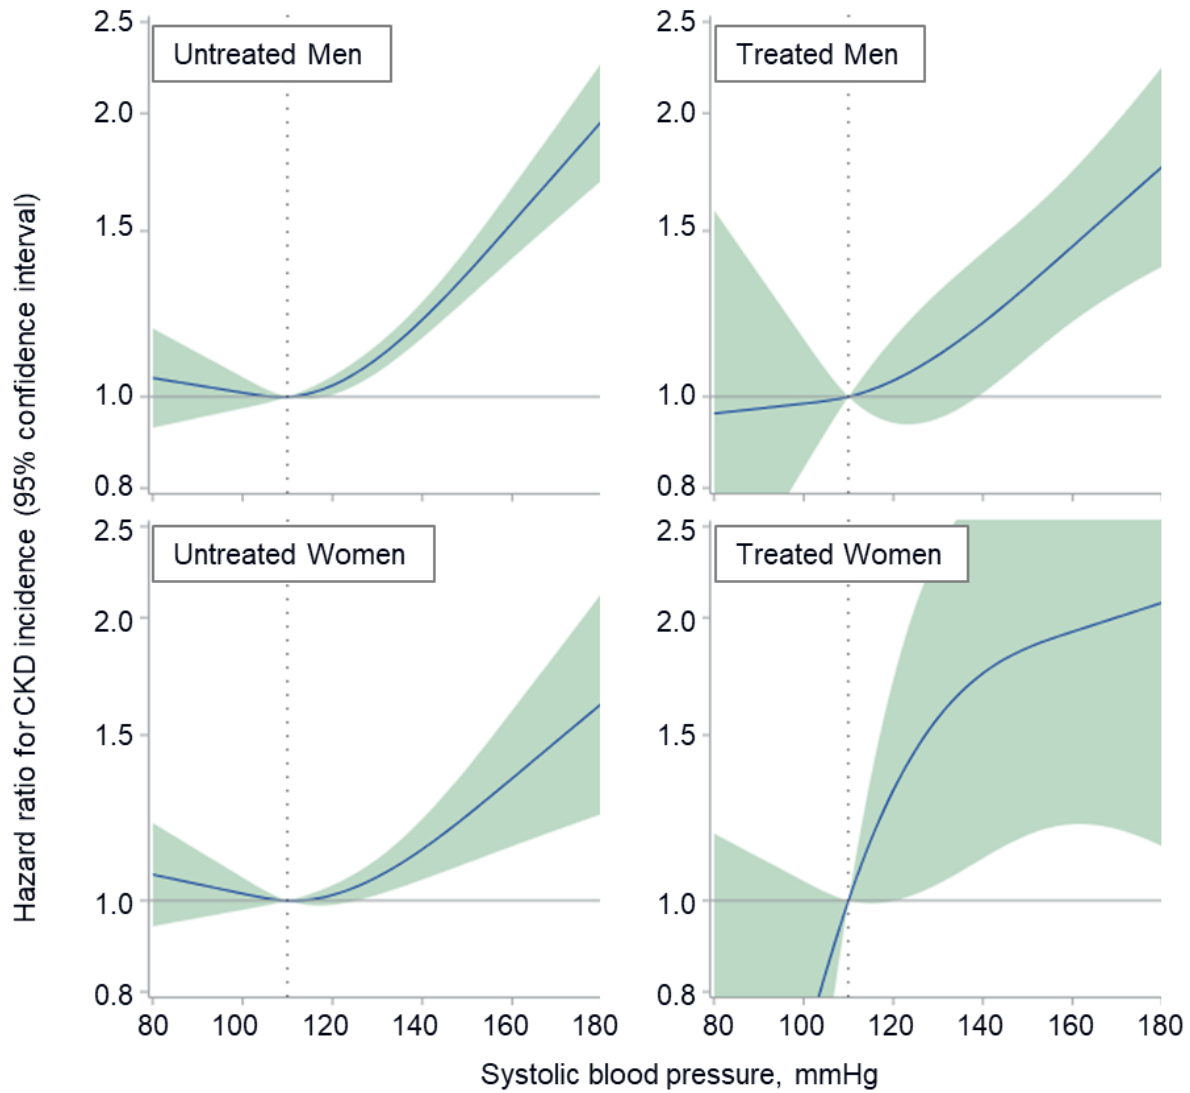

The systolic BP of 110 mmHg, which was the mean value in the normal BP group, was treated as a reference. Hazard ratios were adjusted for the same covariates indicated in **Figure 1**. BP, blood pressure.
